# Supplementary material for: Highly stable Y(iii)-based metal organic framework with two molecular building block for selective adsorption of C2H2 and CO2 over CH4
Source: Royal Society of Chemistry journal article supplement (doi:10.1039/c8qi00083b), 2018-01-01
Supplement: c8qi00083b1.pdf [file c8qi00083b1.pdf]

# **High-Stable Y(III)-Based Metal Organic Framework with Two Molecular Building Block for Selective Adsorption of C<sub>2</sub>H<sub>2</sub> and CO<sub>2</sub> over CH<sub>4</sub>**

Xing Duan,<sup>a\*</sup> Ran Lv<sup>a</sup>, Zhenguo Ji<sup>a\*</sup>, Bin Li,<sup>b</sup> Yuanjing Cui,<sup>b</sup> Yu Yang<sup>b</sup> and Guodong Qian<sup>b\*</sup>

<sup>a</sup> College of materials & environmental engineering, Hangzhou Dianzi University, Hangzhou,  
310027, P. R. China. E-mail: star1987@hdu.edu.cn

<sup>b</sup> State Key Laboratory of Silicon Materials, Cyrus Tang Center for Sensor Materials and  
Applications, School of Materials Science and Engineering, Zhejiang University, Hangzhou,  
310027, P. R. China. E-mail: gdqian@zju.edu.cn

### Derivation of the isosteric heats of adsorption

A virial-type expression of the following form was employed to calculate the enthalpies of adsorption of C<sub>2</sub>H<sub>2</sub>, CO<sub>2</sub> and CH<sub>4</sub>. The data were fitted using the equation:

$$\ln P = \ln N + \frac{1}{T \sum_{i=0}^m a_i N^i} + \sum_{i=0}^n b_i N^i \quad (1)$$

where the  $p$  is pressure expressed in mmHg,  $N$  is the amount adsorbed in mmol g<sup>-1</sup>,  $T$  is the temperature in K,  $a_i$  and  $b_i$  are virial coefficients,  $m$ ,  $n$  represents the number of coefficients required to adequately describe the isotherms. The isosteric heat of adsorption,  $Q_{st}$ , defined as

$$Q_{st} = RT^2 \left( \frac{\partial \ln P}{\partial T} \right) \quad (2)$$

Here,  $Q_{st}$  is the coverage-dependent isosteric heat of adsorption and  $R$  is the universal gas constant of 8.3147 J K<sup>-1</sup> mol<sup>-1</sup>.

### Fitting of pure component isotherms

The adsorption isotherms for C<sub>2</sub>H<sub>2</sub>, CO<sub>2</sub> and CH<sub>4</sub> in **ZJU-16a** were measured at 273 and 298 K and fitted on the basis of the dual site Langmuir-Freundlich equation:

$$N = N_1^{\max} \times \frac{b_1 p^{1/n_1}}{1 + b_1 p^{1/n_1}} + N_2^{\max} \times \frac{b_2 p^{1/n_2}}{1 + b_2 p^{1/n_2}} \quad (3)$$

where  $p$  is the pressure of the bulk gas at equilibrium with the adsorbed phase in kPa,  $N$  is the adsorbed amount per mass of adsorbent in mol/kg,  $N_1^{\max}$  and  $N_2^{\max}$  are the saturation capacities of sites 1 and 2 in mol/kg,  $b_1$  and  $b_2$  are the affinity coefficients of sites 1 and 2 in 1/kPa, and  $n_1$  and  $n_2$  represent the deviations from an ideal homogeneous surface. The fitting parameters of DSLF equation are presented in Table S1.

Adsorption isotherms and gas selectivities calculated by Ideal Adsorbed Solution Theory (IAST) for mixed C<sub>2</sub>H<sub>2</sub>/CH<sub>4</sub> (C<sub>2</sub>H<sub>2</sub>/CH<sub>4</sub> = 50:50) and CO<sub>2</sub>/CH<sub>4</sub> (CO<sub>2</sub>/CH<sub>4</sub> = 50:50) in the **ZJU-16a**. The adsorption selectivities,  $S_{ads}$ , are defined by the following equation:

$$S_{ads} = \frac{q_1/q_2}{p_1/p_2} \quad (4)$$

in which  $p_i$  the bulk gas pressure of species  $i$ , and  $q_i$  the component molar loading of species  $i$ .

**Table1 S1.** Crystallographic Data Collection and Refinement Results for **ZJU-16**.

| <b>ZJU-16</b>    |                                                                                 |
|------------------|---------------------------------------------------------------------------------|
| Chemical formula | C <sub>24</sub> H <sub>12</sub> Y <sub>2</sub> N <sub>3</sub> O <sub>10.5</sub> |
| Formula weight   | 688.19                                                                          |
| Temperature (K)  | 293(2)                                                                          |
| Wavelength (Å)   | 0.71073                                                                         |
| Crystal system   | Hexagonal                                                                       |
| Space group      | P 6 <sub>3</sub> /mmc                                                           |
| $a$ (Å)          | 22.3597(3)                                                                      |
| $b$ (Å)          | 22.3597(3)                                                                      |

|                                                     |                |
|-----------------------------------------------------|----------------|
| $c$ (Å)                                             | 28.2591(12)    |
| $V$ (Å <sup>3</sup> )                               | 12235.5(6)     |
| $Z$                                                 | 12             |
| Density (calculated g/cm <sup>3</sup> )             | 1.121          |
| Absorbance coefficient (mm <sup>-1</sup> )          | 2.872          |
| $F(000)$                                            | 4068           |
| Crystal size(mm <sup>3</sup> )                      | 0.23×0.23×0.1  |
| Goodness of fit on $F^2$                            | 1.106          |
| $R_1, wR_2 [I > 2\sigma(I)]$                        | 0.0893, 0.2938 |
| $R_1, wR_2$ (all data)                              | 0.1378, 0.3202 |
| Largest difference peak and hole(e/Å <sup>3</sup> ) | 4.466, -1.331  |

**Table S2.** Equation parameters for the DSLF isotherm model.

| Adsorbates                            | $N_1^{\max}$<br>(mmol/g) | $b_1$<br>(kPa <sup>-1</sup> ) | $n_1$    | $N_2^{\max}$<br>(mmol/g) | $b_2$<br>(kPa <sup>-1</sup> ) | $n_2$   |
|---------------------------------------|--------------------------|-------------------------------|----------|--------------------------|-------------------------------|---------|
| C <sub>2</sub> H <sub>2</sub> (273 K) | 2.77852                  | 0.0002931                     | 1.092885 | 3.03734                  | 0.062                         | 0.84566 |
| CO <sub>2</sub> (273 K)               | 5.9613                   | 0.00091124                    | 1.1126   | 25.45111                 | 0.00296                       | 0.78477 |
| CH <sub>4</sub> (273 K)               | 3.32223                  | 0.00058575                    | 1.019    | 1.79403                  | 0.00251                       | 0.9968  |
| C <sub>2</sub> H <sub>2</sub> (298 K) | 25.5115                  | 0.00114                       | 0.91943  | 1.40662                  | 0.02751                       | 0.82859 |
| CO <sub>2</sub> (298 K)               | 9.79892                  | 0.00184                       | 0.95983  | 9.73881                  | 0.00171                       | 0.71355 |
| CH <sub>4</sub> (298 K)               | 10.36924                 | 0.00017505                    | 1.18464  | 0.28741                  | 0.01241                       | 1.10857 |

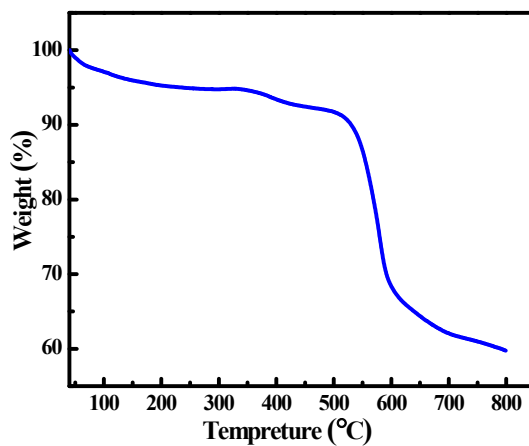

Fig. S1. TGA curves of as-synthesized **ZJU-16**.

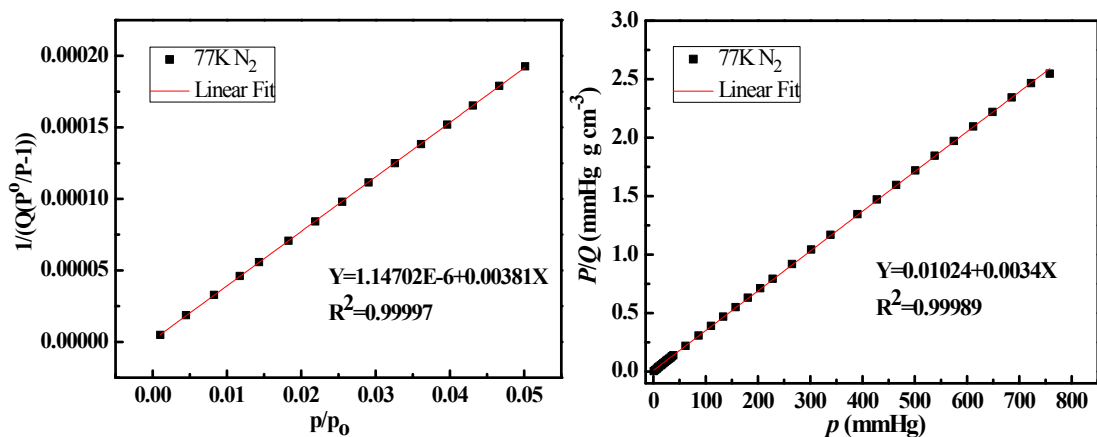

$$S_{\text{BET}} = 1/(\text{Slope} + \text{Intercept}) / 22414 \times 6.023 \times 10^{23} \times 0.162 \times 10^{-18} = 1125 \text{ m}^2/\text{g}$$

$$S_{\text{Langmuir}} = (1/\text{Slope}) / 22414 \times 6.023 \times 10^{23} \times 0.162 \times 10^{-18} = 1280 \text{ m}^2/\text{g}$$

**Fig. S2.** N<sub>2</sub> sorption isotherm at 77 K and BET plot of **ZJU-16a**. Only the range below P/P<sub>0</sub> = 0.05 satisfies the first consistency criterion for applying the BET theory. Solid symbols: adsorption, open symbols: desorption

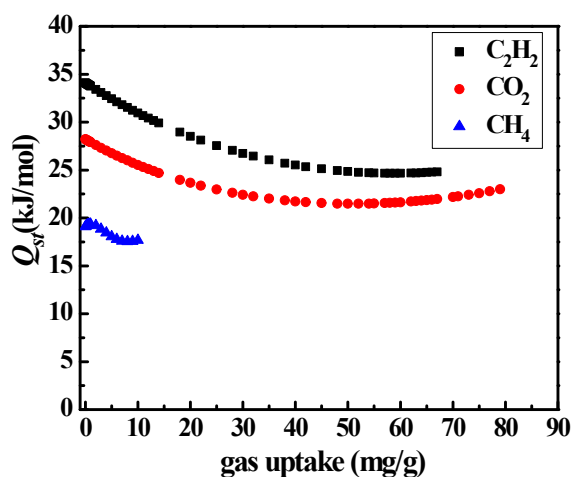

**Fig. S3** the isosteric heats of adsorption of C<sub>2</sub>H<sub>2</sub>, CH<sub>4</sub> and CO<sub>2</sub> calculated using the virial method.
